# Supplementary material for: The Effect of Race-Ethnicity and Geography on Adoption of Innovations in the Treatment of Schizophrenia
Source: Atypon-hosted journal article supplement (doi:10.1176/appi.ps.201100408), 2012-12-01
Supplement: 1171_ds001.pdf [file 1171_ds001.pdf]

## Florida Counties, by Area

| Area | Counties                                                                                                                                  |
|------|-------------------------------------------------------------------------------------------------------------------------------------------|
| 1    | Escambia; Okaloosa; Santa Rosa; Walton                                                                                                    |
| 2    | Bay; Calhoun; Franklin; Gadsden; Gulf; Holmes; Jackson; Jefferson; Leon; Liberty; Madison; Taylor; Wakulla; Washington                    |
| 3    | Alachua; Bradford; Citrus; Columbia; Dixie; Gilchrist; Hamilton; Hernando; Lafayette; Lake; Levy; Marion; Putnam; Sumter; Suwannee; Union |
| 4    | Baker; Clay; Duval; Flagler; Nassau; St Johns; Volusia                                                                                    |
| 5    | Pasco; Pinellas                                                                                                                           |
| 6    | Hardee; Highlands; Hillsborough; Manatee; Polk                                                                                            |
| 7    | Brevard; Orange; Osceola; Seminole                                                                                                        |
| 8    | Charlotte; Collier; Desoto; Glades; Hendry; Lee; Sarasota                                                                                 |
| 9    | Indian River; Martin; Okeechobee; Palm Beach; St Lucie                                                                                    |
| 10   | Broward                                                                                                                                   |
| 11   | Dade; Monroe                                                                                                                              |
